# Supplementary material for: Aberrant hippocampal gamma oscillations in a mouse model of Fragile X Syndrome: Insights from in vitro slice models
Source: Research Square preprint supplement (doi:10.21203/rs.3.rs-6800147/v1), 2025-06-16
Supplement: Supplementary file 1 [file d8e7aab3ebbf678c65b9a99b.pdf]

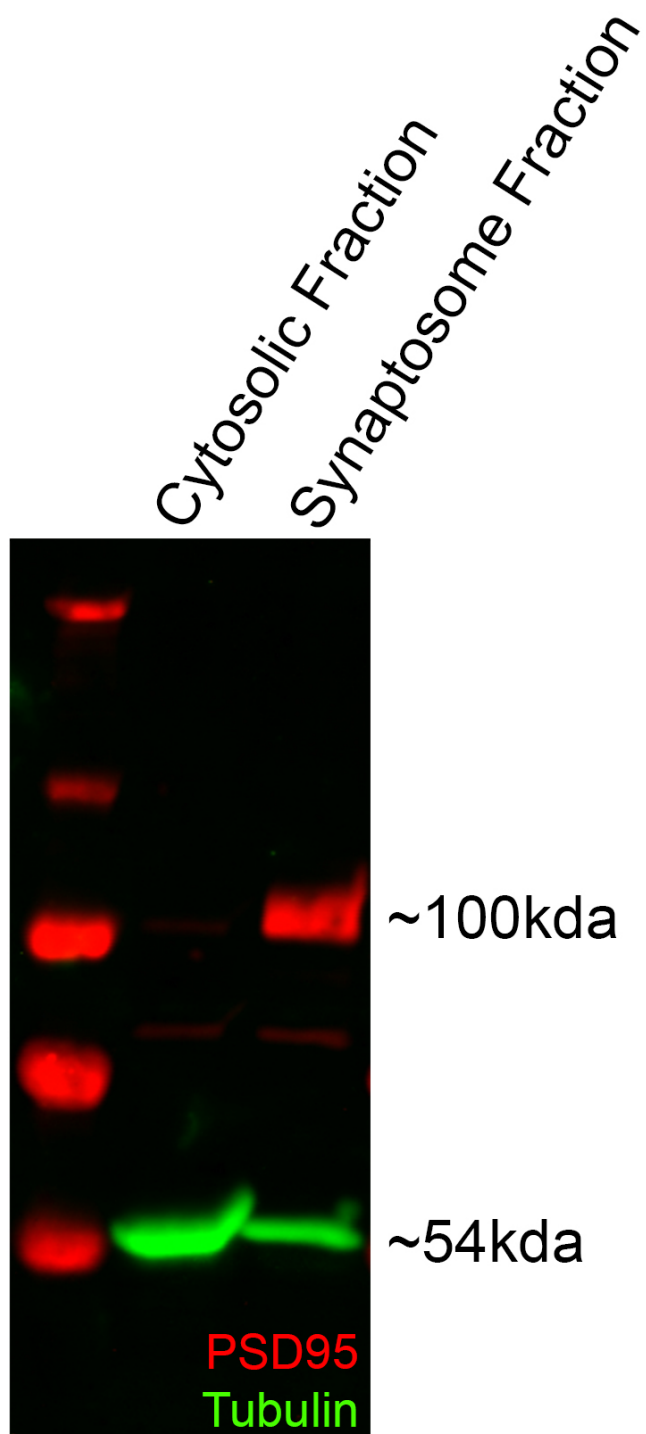

**Supplementary Figure 1 (Supplement to Main Figure 7):** Western blot analysis of fractions obtained from the synaptic enrichment protocol demonstrates a clear enrichment of the synaptic protein PSD95 in the synaptosomal fraction.
